# Supplementary material for: Improving gene function predictions using independent transcriptional components
Source: PubMed Central journal article supplement (PMC7935959; doi:10.1038/s41467-021-21671-w), 2021-03-05
Supplement: 41467_2021_21671_MOESM3_ESM.pdf [file 41467_2021_21671_MOESM3_ESM.pdf]

### **Description of Additional Supplementary Files**

File Name: Supplementary Data 1

Description: Mean prediction scores for gene sets in 16 gene set collections.

File Name: Supplementary Data 2

Description: Gene-wise multifunctionality associations for 16 Gene set collections.

File Name: Supplementary Data 3

Description: Gene clusters derived from the mixing matrix of human microarray ICA.

File Name: Supplementary Data 4

Description: Literature evidence for the predicted functionality of uncharacterized genes.
